# Supplementary material for: Mistranslation can enhance fitness through purging of deleterious mutations
Source: PubMed Central journal article supplement (PMC5454534; doi:10.1038/ncomms15410), 2017-05-19
Supplement: ncomms15410-s1.pdf [file ncomms15410-s1.pdf]

## Supplementary Discussion

### Selective sweeps

In a previous study, we had observed that most SNPs reaching intermediate and high frequencies appeared in the signal peptide of TEM-1.<sup>1</sup> This suggested an important role for the evolution of gene expression in adaptation to elevated mistranslation rates. In contrast, in our present experiments we found that most SNPs reaching intermediate and high frequencies occurred in the structural part of TEM-1 (Supplementary Tables 3 and 4). The only two fixed SNPs in the signaling peptide were I13T, and the synonymous change CTT21CTG. Both of these substitutions were fixed only in wild-type populations. Scarcity of changes in this region reflects weak selection for increased or decreased expression of TEM-1.

When studying SNPs appearing in the structural part of TEM-1, we only observed three of the four substitutions that often occur in combination in laboratory and clinical isolates.<sup>2-4</sup> Of the four substitutions (A42G, E104K, M182T, and G238S), we did not observe A42G. A42G may stabilize the active site of TEM-1,<sup>3</sup> and its absence can be compensated for by other stabilizing substitutions.<sup>5</sup> Indeed, we found T265M and other stabilizing substitutions present at high frequencies in evolved populations (Supplementary Table 3).

In our experiments, the exponential increase in cefotaxime MIC was accompanied by selective sweeps of G238G, E104K and M182T in six out of eight experimental populations (Supplementary Fig. 3a,b), regardless of the rate of mistranslation. M182T was absent from only one of the wild-type populations (Supplementary Fig. 3b, WT 3), but its stabilizing effect may have been compensated by H153R<sup>6</sup> and A224V<sup>7</sup> which occurred in this population (Supplementary Table 3). In addition, in one error-prone population M182T appeared but never reached a frequency above 90% (Supplementary Fig. 3C, EP 3). This population harbored H153R, as well as S286G, which can also stabilize TEM-1.<sup>8</sup>

If mistranslation increased the strength of selection for protein stability<sup>1</sup> in our experiments, we would expect stabilizing SNPs to reach higher frequencies in mistranslating compared to wild-type populations. However, out of all stabilizing SNPs that became fixed in wild-type populations (I47V, N100D, I208M, T265M, and K288E), I47V is the only one found at high frequency in a mistranslating population, and it occurs in only one such population ( $\approx 88\%$ ) (Supplementary Table 3). The finding that stabilizing SNPs are not present at high frequencies in mistranslating populations suggests that selection for resistance to cefotaxime is much stronger than selection for stability in mistranslating hosts. For example, G238S is a crucial early step in the evolution of resistance to cefotaxime.<sup>4</sup> However, G238S destabilizes TEM-1 and this slows down the accumulation of other nonsynonymous SNPs in mistranslating conditions. Even if potentially stabilizing SNPs occur in the population, their fixation is prevented by strong selection that drives alleles with G238S (in the first round of evolution) and E104K (in the second) to high frequency.

The finding that stabilizing SNPs found in wild-type populations lack parallelism, i.e. that these SNPs fix only in one replicate population, supports the claim that these SNPs have weak beneficial effects at best under selection for resistance against cefotaxime.

That strong selection for resistance against cefotaxime rather than for increased stability or expression drives most adaptive changes, is supported by an additional finding: No synonymous SNP reaches high frequency in TEM-1 populations evolved in mistranslating hosts, even though some such SNPs could reduce destabilizing effects of mistranslation by increasing translational accuracy. Taken together, these results suggested that selective sweeps occurring in our experiment are dominated by selection for high activity against cefotaxime.

## Supplementary Figures

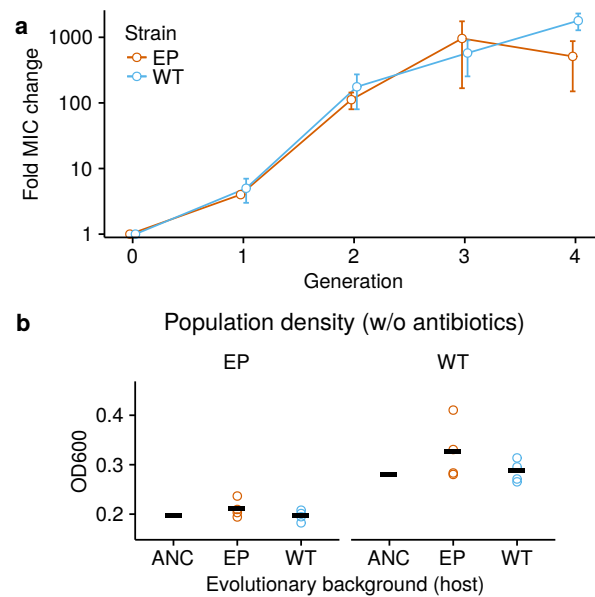

**Supplementary Figure 1:** Phenotypic evolution of TEM-1. **a**, Relative increase in cefotaxime resistance during the evolution experiment. To get the relative increase in MIC on cefotaxime, we divided the MIC of a population with the MIC of the ancestral TEM-1 allele carried by the same type of host (error-prone or wild-type). Points correspond to means of four replicate populations, and error bars refer to standard deviations. **b**, Optical density of evolved populations in media without antibiotics. We transformed each evolved population into error-prone (EP) and wild-type (WT) hosts, and determined its optical density after 24 h of growth in media with no antibiotics. Circles correspond to the mean optical density of replicate populations (each mean is based on 38 measurements). Each black horizontal bar corresponds to mean optical density across four replicate populations. horizontal axis labels: ANC:ancestral TEM-1, EP: TEM-1 populations evolved in error-prone hosts; WT: TEM-1 populations evolved in error-prone hosts.

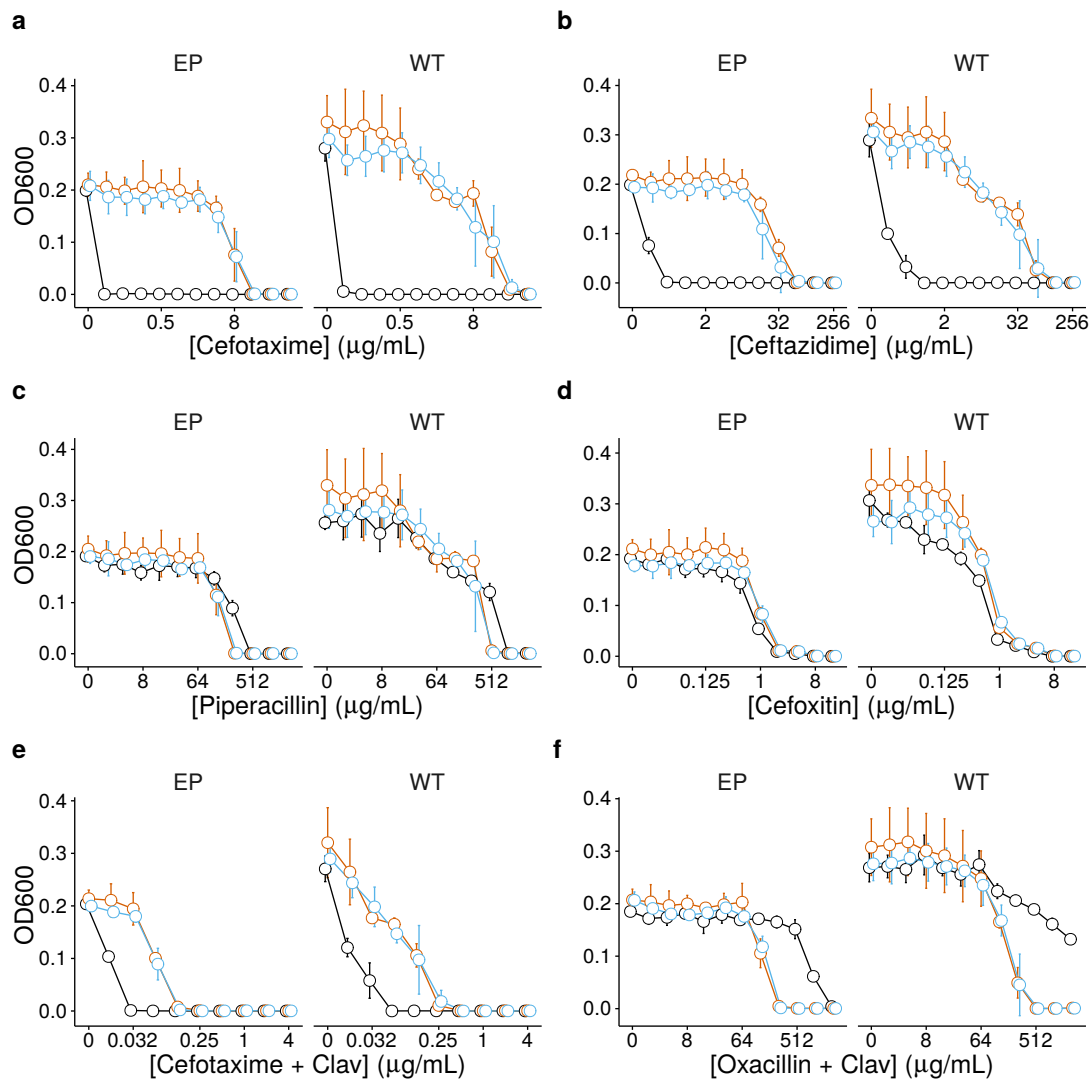

**Supplementary Figure 2:** Optical densities (OD<sub>600</sub>) of evolved populations measured in media with different  $\beta$ -lactam antibiotics and  $\beta$ -lactamase inhibitors (Clav = clavulanic acid). Each population that had evolved in wild-type hosts (blue) and error-prone hosts (red) was expressed in both wild-type (WT) and error-prone (EP) hosts. We used ancestral TEM-1 as a control in these experiments (black). Transformed cells were allowed to recover and then exposed to LB media with different concentrations of  $\beta$ -lactam antibiotics. Optical density was measured at 600 nm after  $\approx 24$  hours. Optical density was computed as a mean from at least four independent experiments, and circles correspond to means across four populations. Error bars refer to standard deviations across four populations. Clavulanic acid concentration was 0.1  $\mu\text{g/mL}$  in combination with cefotaxime and 0.5  $\mu\text{g/mL}$  in combination with oxacillin.

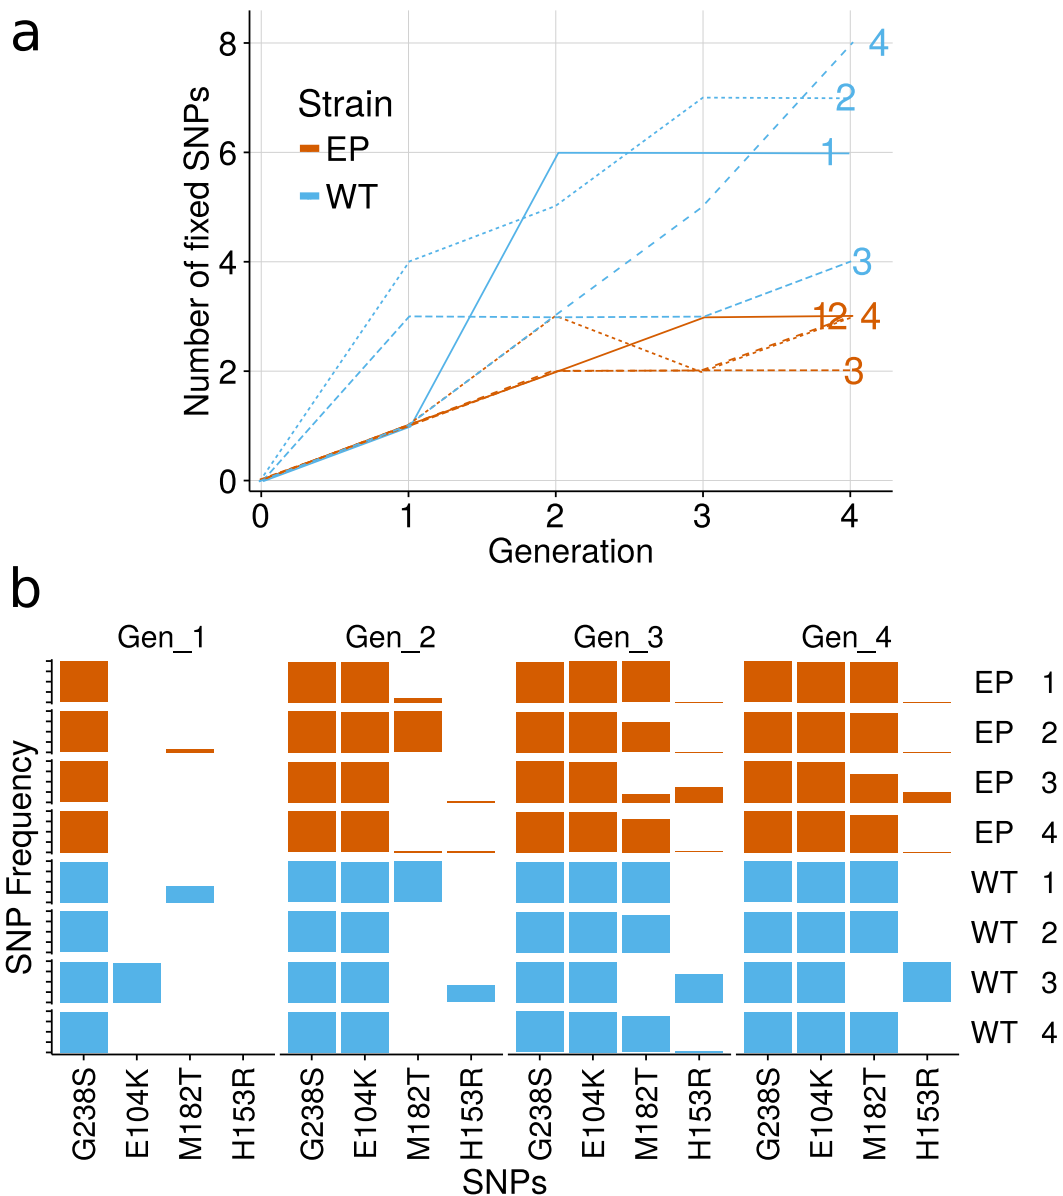

**Supplementary Figure 3:** Number of fixed SNPs, and frequencies of SNPs implicated in resistance to cefotaxime. **a**, The number of fixed SNPs (frequency greater than 90%) in experimental populations. The line type and the numbers correspond to the replicate population **b**, Frequency of SNPs known to be important for the evolution of cefotaxime resistance in all four generations of evolution. The height of the bar corresponds to the SNP frequency (shown in the range 0–100%).

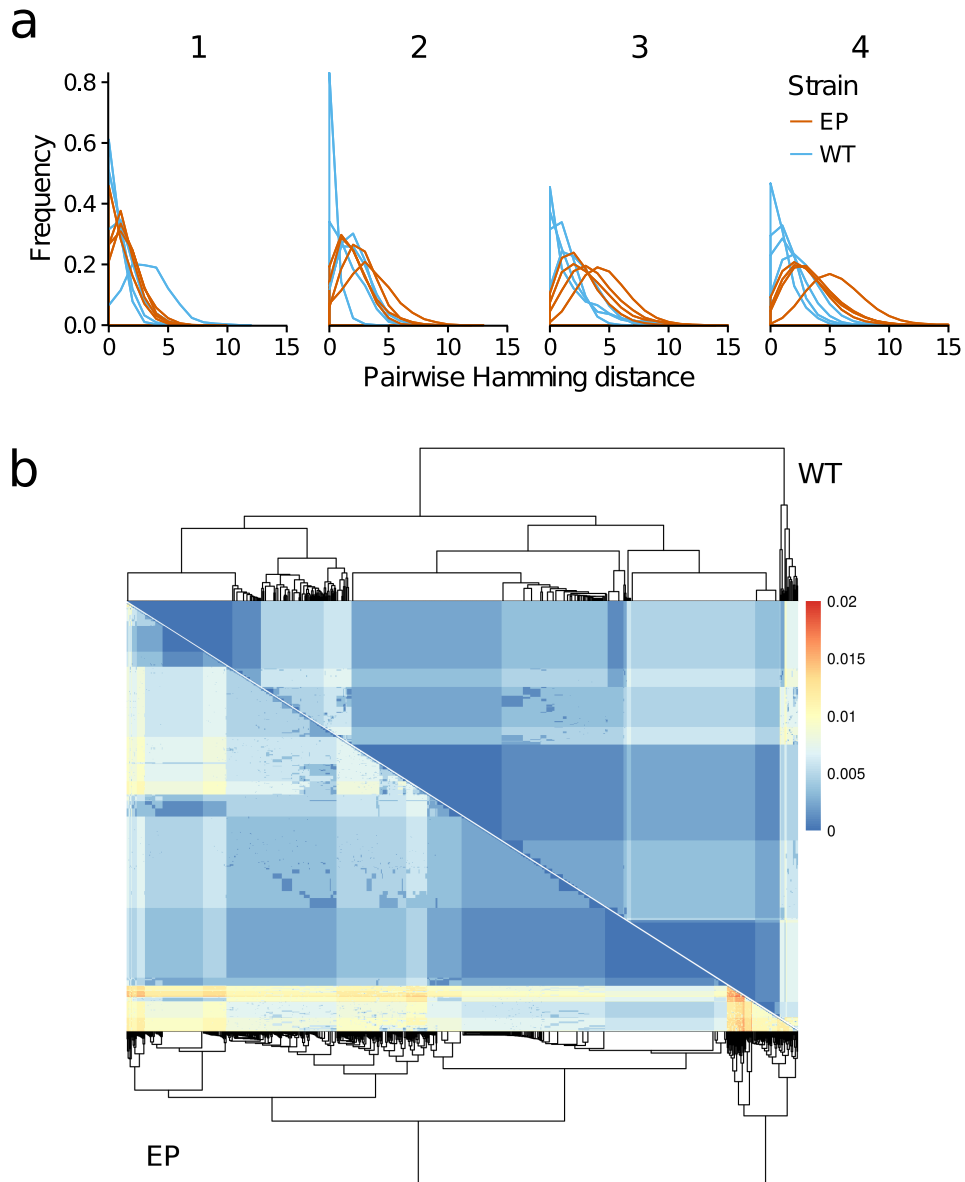

**Supplementary Figure 4:** Sequence diversity in evolved populations. **a**, The distribution of pairwise nucleotide sequence (Hamming) distances for each of the populations in all four generations. **b**, Diversity in pooled subsamples of nucleotide sequences from the final (fourth) generation. We randomly sampled 200 sequences from each of the populations, and then pooled them according to host in which they have evolved (EP = error-prone, WT = wild-type). We hierarchically clustered these sequences based on their nucleotide sequence identity, and created heatmaps of the resulting distance matrices. Pairwise sequence distance ranges from zero (blue) to 0.02 (red). The upper triangle corresponds to sequences from wild-type hosts, while the lower triangle corresponds to sequences from error-prone hosts.

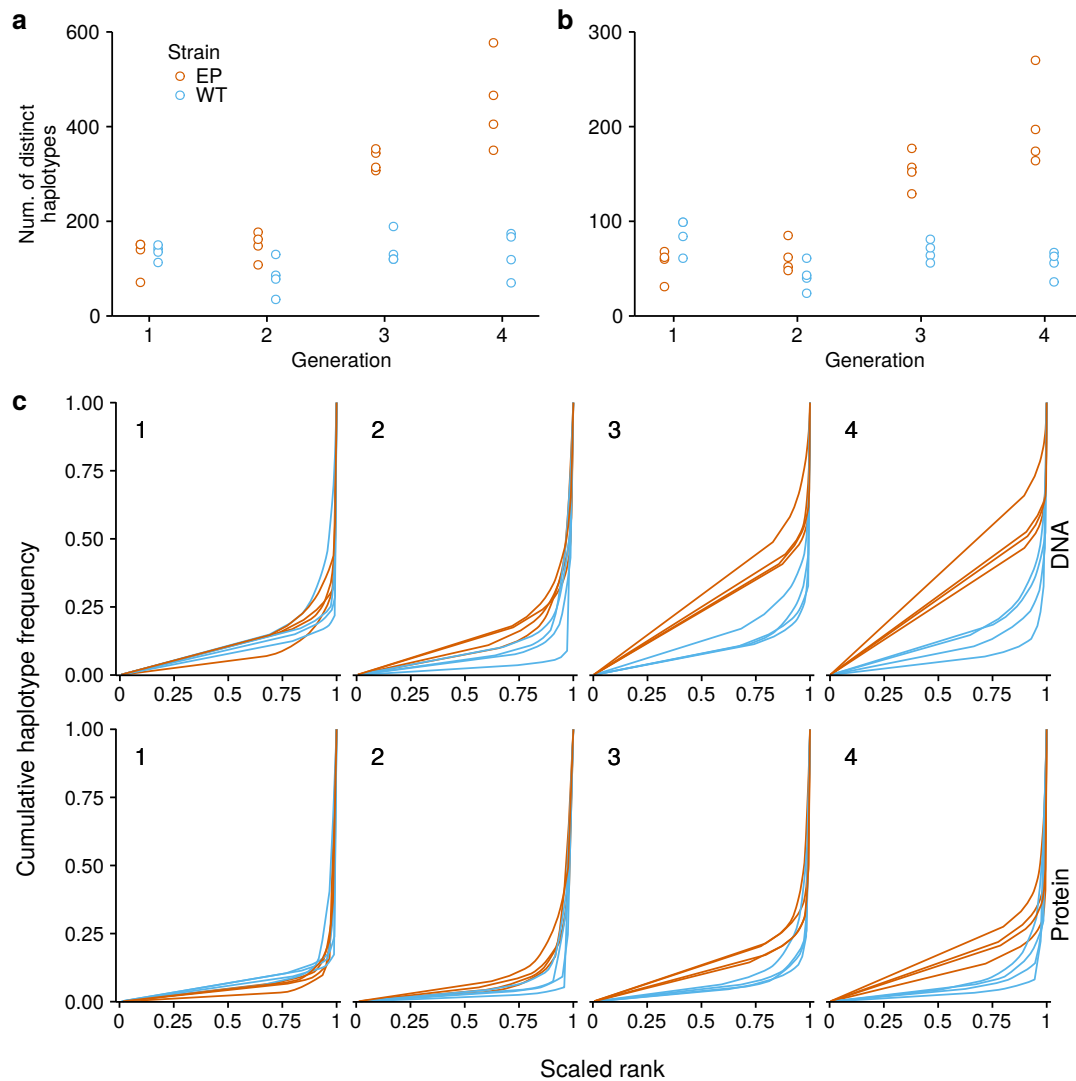

**Supplementary Figure 5:** Haplotype analysis in experimental populations. **a**, Number of distinct haplotypes (DNA level) in experimental populations. We counted the number of distinct haplotypes on the nucleotide level in each of the experimental populations during the four generations of experimental evolution. **b**, Number of distinct haplotypes (protein level) in experimental populations. We counted the number of distinct haplotypes on the protein level in each of the experimental populations during the four generations of experimental evolution. **c**, Cumulative variant (haplotype) frequencies in experimental populations. We calculated the frequency of each variant, on the DNA (top) and the protein (bottom) level, found in each of the populations from all four generations of evolution. We ranked variants based on their frequency, scaled their rank to an interval  $[0, 1]$  range, and calculated the cumulative frequency distribution for each of the populations. For example, the cumulative frequency of 0.25 and the scaled rank of 0.9 mean that the frequencies of the 90% of all haplotypes (ordered by their abundance) sum up to 25%.

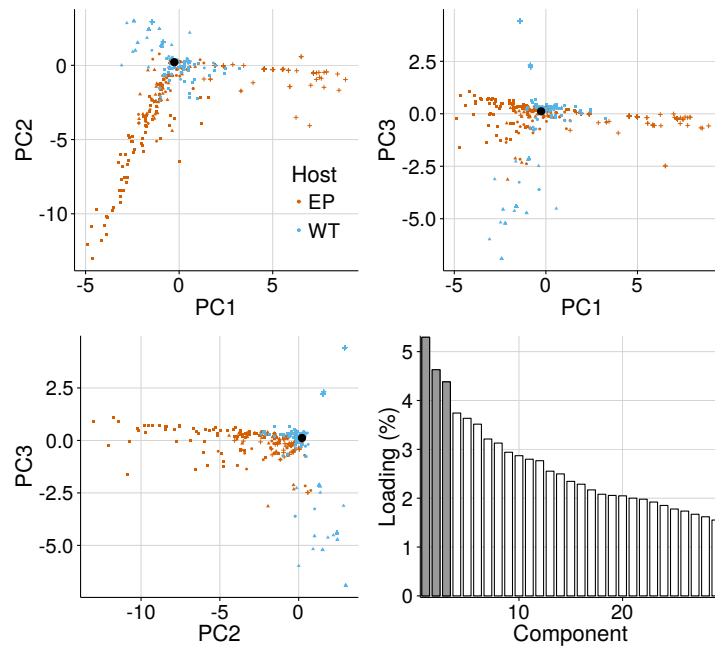

**Supplementary Figure 6:** The distribution of evolved DNA sequences in sequence space. We randomly sampled 200 sequences without replacement from all populations after the fourth generation of evolution, aligned them, and then projected the aligned sequences onto two dimensional space using principal component analysis (PCA). The figure shows the first three principal components (PC1, PC2, and PC3). Each symbol shape corresponds to a sequence, colors correspond to hosts (red = error-prone, blue = wild-type), and different shapes correspond to different replicate populations. The black circle corresponds to the ancestral TEM-1 sequence. The histogram shows axes loadings<sup>9</sup> for the first 30 principal component axes. The shaded region corresponds to the three axes used in the plot.



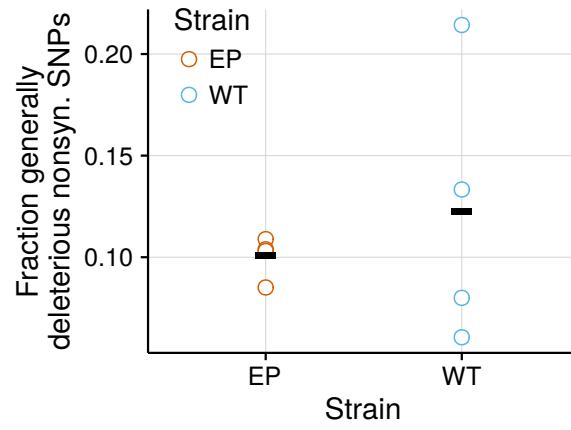

**Supplementary Figure 7:** Fraction of generally deleterious SNPs. Data are based on all nonsynonymous SNPs whose frequency decreases by more than 0.5% in both hosts and after selection in all three antibiotics (piperacillin, cefoxitin, and oxacillin with clavulanic acid).

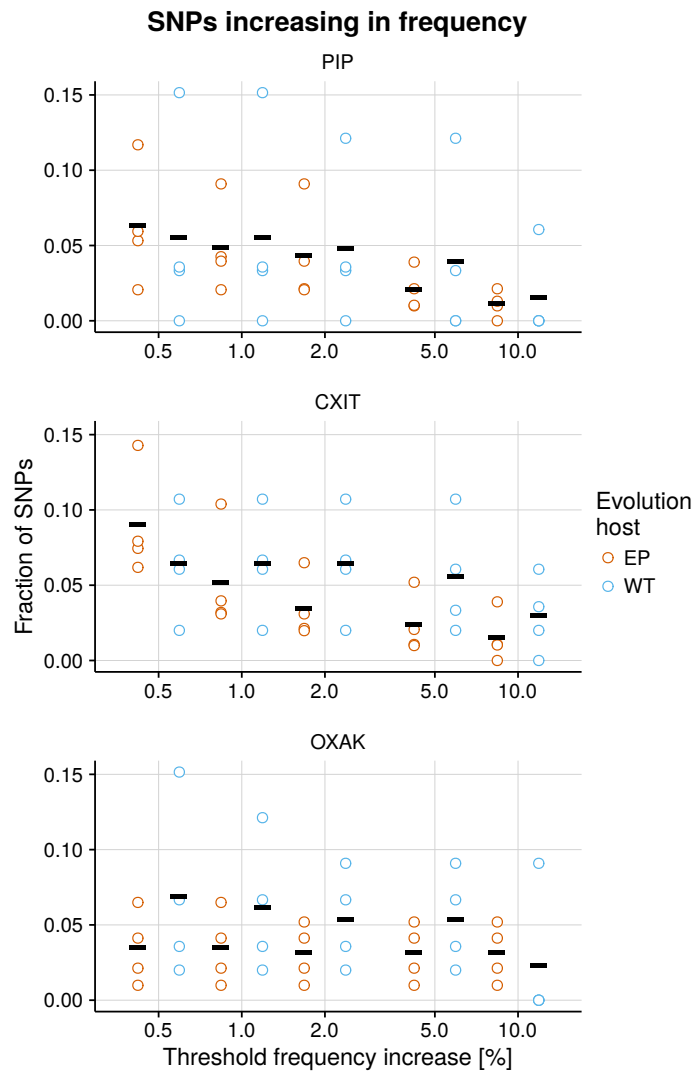

**Supplementary Figure 8:** Fraction of beneficial SNPs. The fraction of nonsynonymous SNPs whose frequency increases in wild-type hosts by more than 0.5% after selection in piperacillin (PIP), cefoxitin (CXIT), and oxacillin with clavulanic acid (OXAK).

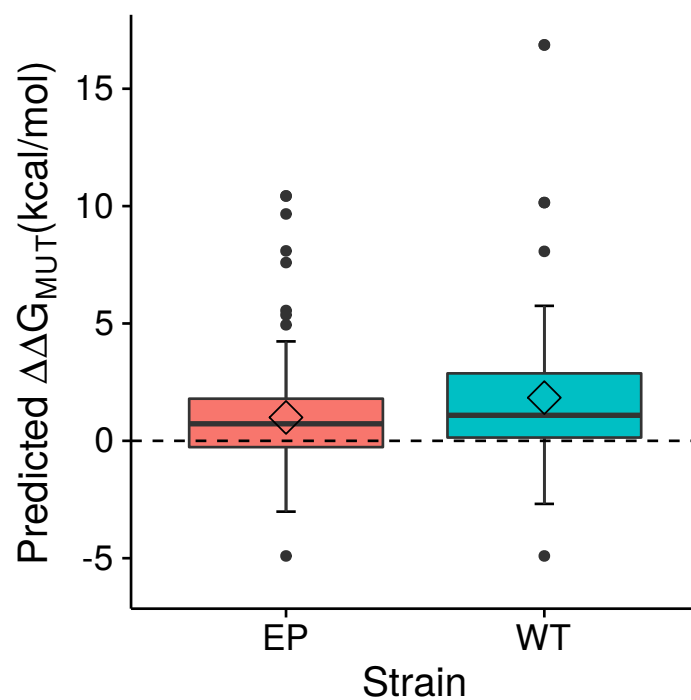

**Supplementary Figure 9:** Computationally predicted stability effects of purged SNPs. The figure shows the FoldX-predicted<sup>10</sup> distribution of  $\Delta\Delta G_{MUT}$  for SNPs whose frequency decreased after the last generation of selection in cefotaxime. Mutations with lower  $\Delta\Delta G_{MUT}$  values are less destabilizing. SNPs that decrease in frequency upon selection with cefotaxime between generation 3 and 4, have significantly lower  $\Delta\Delta G_{MUT}$  in error-prone populations (two sided Mann–Whitney U test,  $U = 9507.5$ ,  $P = 0.004649$ ). Diamond shapes and thick horizontal lines show the mean and median of the distribution. Boxes extend to the first and third quartiles. The upper and the lower whiskers extend to the highest and the lowest values that are within  $1.5 \times$  IQR (inter-quartile range) of the box. Extreme values of  $\Delta\Delta G_{MUT}$  (lower than  $-20$  kcal/mol, and greater than  $20$  kcal/mol) were excluded from the plot for clarity, but they were included in the statistical analysis above.

## Supplementary Tables

**Supplementary Table 1:** Cefotaxime MIC values after the selection. Values are in  $\mu\text{g}/\text{mL}$ . MIC(Ancestral) is the mean  $\pm$  standard deviation of four replicates, measured for mistranslating and wild-type hosts carrying the pHS13T plasmid with the ancestral TEM-1, using the same medium as for experimental populations.

| Strain         | MIC(Ancestral)    | Population | MIC(Gen1) | MIC(Gen2) | MIC(Gen3) | MIC(Gen4) |
|----------------|-------------------|------------|-----------|-----------|-----------|-----------|
| Mistranslating | $0.055 \pm 0.014$ | 1          | 0.25      | 4.00      | 128.00    | 64.00     |
|                |                   | 2          | 0.25      | 4.00      | 64.00     | 32.00     |
|                |                   | 3          | 0.25      | 2.00      | 16.00     | 16.00     |
|                |                   | 4          | 0.25      | 4.00      | 32.00     | 16.00     |
| Wild-type      | $0.141 \pm 0.070$ | 1          | 0.50      | 16.00     | 256.00    | 256.00    |
|                |                   | 2          | 1.00      | 8.00      | 128.00    | 256.00    |
|                |                   | 3          | 0.50      | 16.00     | 128.00    | 128.00    |
|                |                   | 4          | 0.50      | 4.00      | 64.00     | 256.00    |

**Supplementary Table 2:** Sequencing and SNP statistics. Population names (left-most column) are given in the format Host\_Replicate.Generation. EP and WT refer to error-prone and wild-type hosts, respectively. The number of SNPs refers to observed SNPs before (raw) and after quality filtering (HQ).

| Library         | Reads | Mean Quality | SNPs (raw) | SNPs (HQ) | SNPs per read (raw) | SNPs per read (HQ) |
|-----------------|-------|--------------|------------|-----------|---------------------|--------------------|
| EP.L1.G1        | 661   | 40.7         | 1409       | 1197      | 2.13                | 1.81               |
| EP.L2.G1        | 723   | 40.7         | 1599       | 1258      | 2.21                | 1.74               |
| EP.L3.G1        | 691   | 40.8         | 1182       | 1019      | 1.71                | 1.47               |
| EP.L4.G1        | 734   | 40.9         | 1532       | 1230      | 2.09                | 1.68               |
| EP.L1.G2        | 707   | 40.6         | 3321       | 2883      | 4.70                | 4.08               |
| EP.L2.G2        | 721   | 40.8         | 3037       | 2782      | 4.21                | 3.86               |
| EP.L3.G2        | 823   | 40.6         | 3676       | 3338      | 4.47                | 4.06               |
| EP.L4.G2        | 671   | 40.6         | 2618       | 2275      | 3.90                | 3.39               |
| EP.L1.G3        | 645   | 40.6         | 3089       | 2708      | 4.79                | 4.20               |
| EP.L2.G3        | 673   | 40.5         | 3329       | 2891      | 4.95                | 4.30               |
| EP.L3.G3        | 584   | 40.5         | 3361       | 2921      | 5.76                | 5.00               |
| EP.L4.G3        | 705   | 40.4         | 4961       | 4408      | 7.04                | 6.25               |
| EP.L1.G4        | 626   | 40.4         | 3290       | 2748      | 5.26                | 4.39               |
| EP.L2.G4        | 698   | 40.6         | 3840       | 3225      | 5.50                | 4.62               |
| EP.L3.G4        | 785   | 40.4         | 5422       | 4531      | 6.91                | 5.77               |
| EP.L4.G4        | 896   | 40.4         | 6814       | 6130      | 7.60                | 6.84               |
| WT.L1.G1        | 666   | 40.8         | 2755       | 2305      | 4.14                | 3.46               |
| WT.L2.G1        | 743   | 40.9         | 3242       | 3104      | 4.36                | 4.18               |
| WT.L3.G1        | 750   | 40.9         | 2550       | 2394      | 3.40                | 3.19               |
| WT.L4.G1        | 755   | 40.8         | 2437       | 2218      | 3.23                | 2.94               |
| WT.L1.G2        | 722   | 40.8         | 4379       | 4308      | 6.07                | 5.97               |
| WT.L2.G2        | 766   | 40.7         | 4920       | 4605      | 6.42                | 6.01               |
| WT.L3.G2        | 856   | 40.6         | 4007       | 3635      | 4.68                | 4.25               |
| WT.L4.G2        | 751   | 40.7         | 3765       | 3549      | 5.01                | 4.73               |
| WT.L1.G3        | 821   | 40.5         | 5526       | 5251      | 6.73                | 6.40               |
| WT.L2.G3        | 786   | 40.7         | 7022       | 6732      | 8.93                | 8.56               |
| WT.L3.G3        | 758   | 40.5         | 3861       | 3486      | 5.09                | 4.60               |
| WT.L4.G3        | 767   | 40.6         | 6063       | 5835      | 7.90                | 7.61               |
| WT.L1.G4        | 708   | 40.6         | 5017       | 4726      | 7.09                | 6.68               |
| WT.L2.G4        | 750   | 40.6         | 7008       | 6693      | 9.34                | 8.92               |
| WT.L3.G4        | 736   | 40.4         | 4301       | 3861      | 5.84                | 5.25               |
| WT.L4.G4        | 737   | 40.7         | 7288       | 7090      | 9.89                | 9.62               |
| EP.L1.CTRL      | 689   | 40.7         | 779        | 513       | 1.13                | 0.74               |
| EP.L2.CTRL      | 767   | 40.6         | 905        | 590       | 1.18                | 0.77               |
| WT.L1.CTRL      | 735   | 40.7         | 862        | 597       | 1.17                | 0.81               |
| WT.L2.CTRL      | 740   | 40.4         | 900        | 617       | 1.22                | 0.83               |
| TEM-1(Ancessor) | 767   | 40.8         | 49         | 27        | 0.06                | 0.04               |
| TEM-1(Ancessor) | 800   | 40.6         | 50         | 31        | 0.06                | 0.04               |

**Supplementary Table 3:** Nonsynonymous SNPs found at frequencies greater than 10%. Rows are ordered according to position in TEM-1 (in Ambler numbering<sup>11</sup>). SNPs found at frequencies above 90% in at least one population are shown in bold. SNPs known to have stabilizing effects<sup>1,8</sup> are highlighted in cyan.

| Position | SNP          | Strain | Population | Frequency in generation |      |      |      |
|----------|--------------|--------|------------|-------------------------|------|------|------|
|          |              |        |            | 1                       | 2    | 3    | 4    |
| 13       | <b>I13T</b>  | WT     | 3          | 95.7                    | 98.7 | 97.8 | 98.8 |
| 15       | F15L         | WT     | 2          | 0.0                     | 0.0  | 77.1 | 85.7 |
| 16       | F16L         | WT     | 4          | 0.0                     | 74.3 | 1.0  | 0.0  |
| 21       | L21P         | WT     | 4          | 77.4                    | 75.9 | 3.1  | 0.0  |
| 34       | <b>K34R</b>  | WT     | 2          | 0.0                     | 0.0  | 90.6 | 97.7 |
| 38       | D38N         | WT     | 3          | 0.0                     | 19.3 | 16.9 | 19.3 |
| 47       | <b>I47V</b>  | EP     | 4          | 17.9                    | 59.8 | 80.3 | 87.8 |
|          |              | WT     | 4          | 0.0                     | 0.0  | 92.2 | 99.1 |
| 56       | <b>I56V</b>  | WT     | 2          | 98.3                    | 98.2 | 98.7 | 97.5 |
| 100      | <b>N100D</b> | WT     | 4          | 84.0                    | 98.5 | 99.1 | 97.8 |
| 104      | <b>E104K</b> | EP     | 1          | 0.0                     | 98.2 | 98.1 | 97.4 |
|          |              |        | 2          | 0.0                     | 97.8 | 98.5 | 97.4 |
|          |              |        | 3          | 0.0                     | 98.2 | 97.6 | 98.0 |
|          |              |        | 4          | 0.0                     | 99.1 | 96.9 | 98.9 |
|          |              | WT     | 1          | 0.0                     | 98.5 | 97.8 | 98.3 |
|          |              |        | 2          | 0.0                     | 98.3 | 97.3 | 98.8 |
|          |              |        | 3          | 95.6                    | 98.6 | 98.8 | 97.6 |
|          |              |        | 4          | 0.0                     | 98.7 | 98.0 | 98.4 |
| 112      | H112Y        | EP     | 1          | 0.0                     | 10.2 | 0.0  | 0.0  |
|          |              |        | 2          | 0.0                     | 0.0  | 48.9 | 32.5 |
| 120      | <b>R120G</b> | EP     | 4          | 10.0                    | 12.7 | 4.4  | 4.6  |
| 140      | T140A        | EP     | 1          | 16.8                    | 37.5 | 14.7 | 13.1 |
|          |              |        | 2          | 12.2                    | 10.7 | 10.8 | 6.9  |
| 141      | T141A        | EP     | 3          | 3.2                     | 48.0 | 18.2 | 28.9 |
| 146      | K146E        | EP     | 1          | 0.5                     | 10.9 | 0.0  | 0.3  |
| 147      | <b>E147G</b> | EP     | 1          | 0.0                     | 32.0 | 0.2  | 0.0  |
|          |              | WT     | 3          | 0.0                     | 18.0 | 14.9 | 2.7  |
| 153      | <b>H153R</b> | EP     | 3          | 0.0                     | 3.4  | 37.8 | 25.9 |
|          |              | WT     | 3          | 0.0                     | 41.0 | 68.7 | 96.9 |
|          | H153D        | WT     | 1          | 20.3                    | 0.0  | 0.0  | 0.0  |
| 154      | N154S        | WT     | 2          | 0.0                     | 17.1 | 0.3  | 0.0  |
| 173      | I173T        | EP     | 2          | 0.0                     | 12.7 | 0.1  | 0.1  |
| 182      | <b>M182T</b> | EP     | 1          | 0.0                     | 9.9  | 98.9 | 98.2 |
|          |              |        | 2          | 8.8                     | 98.7 | 72.7 | 95.7 |
|          |              |        | 3          | 0.0                     | 0.1  | 20.5 | 68.0 |
|          |              |        | 4          | 0.0                     | 3.0  | 80.9 | 90.3 |
|          |              | WT     | 1          | 38.8                    | 98.9 | 97.8 | 99.6 |
|          |              |        | 2          | 0.0                     | 0.0  | 90.8 | 99.5 |
|          |              |        | 4          | 0.0                     | 0.0  | 87.1 | 98.8 |
| 208      | <b>I208M</b> | WT     | 2          | 98.6                    | 98.2 | 98.1 | 97.5 |
| 224      | <b>A224V</b> | WT     | 3          | 0.0                     | 0.0  | 13.1 | 26.1 |
| 238      | <b>G238S</b> | EP     | 1          | 98.5                    | 98.3 | 97.7 | 99.0 |
|          |              |        | 2          | 98.6                    | 99.4 | 97.9 | 97.7 |
|          |              |        | 3          | 99.1                    | 98.5 | 97.6 | 98.5 |
|          |              |        | 4          | 98.1                    | 99.3 | 97.6 | 98.5 |
|          |              | WT     | 1          | 98.6                    | 99.3 | 98.4 | 98.9 |
|          |              |        | 2          | 99.3                    | 99.2 | 98.3 | 98.3 |
|          |              |        | 3          | 98.6                    | 98.5 | 98.0 | 98.1 |
|          |              |        | 4          | 98.8                    | 98.7 | 99.3 | 98.8 |
| 265      | <b>T265M</b> | WT     | 1          | 20.9                    | 99.6 | 99.0 | 98.9 |
| 268      | S268G        | EP     | 3          | 2.8                     | 65.5 | 61.6 | 50.8 |
| 273      | D273G        | WT     | 4          | 0.0                     | 0.0  | 0.0  | 82.9 |
| 288      | <b>K288E</b> | WT     | 2          | 98.5                    | 97.9 | 97.8 | 96.7 |

**Supplementary Table 4:** Synonymous SNPs found at frequencies greater than 10%. Rows are ordered according to position in TEM-1 (in Ambler numbering<sup>11</sup>). SNPs found at frequencies above 90% in at least one population are shown in bold.

| Position | SNP              | Strain | Population | Frequency in generation |      |      |      |
|----------|------------------|--------|------------|-------------------------|------|------|------|
|          |                  |        |            | 1                       | 2    | 3    | 4    |
| 15       | TTT15TTC         | WT     | 1          | 47.6                    | 0.0  | 0.0  | 0.0  |
| 21       | <b>CTT21CTG</b>  | EP     | 3          | 8.4                     | 4.1  | 25.0 | 21.1 |
|          |                  | WT     | 4          | 1.6                     | 11.2 | 90.9 | 95.0 |
| 24       | TTT24TTC         | WT     | 1          | 46.1                    | 0.0  | 0.1  | 0.0  |
| 76       | <b>CTA76CTG</b>  | WT     | 4          | 0.0                     | 0.0  | 85.5 | 97.7 |
| 83       | CGT83CGC         | WT     | 2          | 0.0                     | 22.6 | 4.2  | 0.0  |
| 84       | GTT84GTC         | EP     | 4          | 0.0                     | 4.6  | 67.5 | 71.7 |
|          |                  | WT     | 3          | 0.0                     | 0.0  | 1.6  | 17.4 |
| 91       | <b>CTC91CTT</b>  | WT     | 1          | 0.2                     | 99.4 | 97.8 | 97.7 |
| 97       | TAT97TAC         | EP     | 3          | 3.8                     | 35.9 | 16.6 | 23.2 |
| 98       | TCT98TCC         | EP     | 3          | 6.5                     | 3.8  | 24.1 | 18.7 |
| 107      | CCA107CCG        | WT     | 4          | 0.0                     | 0.0  | 0.0  | 88.6 |
| 115      | <b>GAT115GAC</b> | WT     | 4          | 0.0                     | 4.5  | 86.3 | 98.8 |
| 120      | AGA120AGG        | EP     | 3          | 0.0                     | 14.8 | 6.2  | 13.1 |
| 122      | TTA122TTG        | EP     | 2          | 11.5                    | 5.8  | 0.4  | 0.3  |
|          | TTA122CTA        | WT     | 2          | 0.1                     | 24.9 | 4.1  | 0.0  |
| 144      | GGA144GGG        | WT     | 2          | 0.0                     | 6.0  | 84.0 | 89.1 |
| 157      | GAT157GAC        | EP     | 2          | 0.0                     | 13.0 | 0.1  | 0.6  |
| 162      | <b>CTT162CTC</b> | WT     | 1          | 42.5                    | 97.5 | 96.8 | 96.6 |
| 170      | AAT170AAC        | WT     | 2          | 0.0                     | 19.6 | 0.0  | 0.0  |
| 184      | GCA184GCG        | EP     | 3          | 0.0                     | 12.6 | 10.4 | 6.2  |
| 199      | CTT199CTC        | EP     | 1          | 0.0                     | 36.8 | 0.2  | 0.2  |
| 207      | TTA207CTA        | EP     | 1          | 0.0                     | 10.5 | 0.3  | 0.5  |
| 219      | CCA219CCG        | WT     | 2          | 0.0                     | 15.1 | 0.0  | 0.0  |
| 225      | CTT225CTC        | EP     | 3          | 4.1                     | 2.1  | 18.0 | 11.7 |
| 235      | TCT235TCC        | EP     | 4          | 1.2                     | 2.2  | 63.4 | 73.7 |
| 274      | GAA274GAG        | EP     | 4          | 1.7                     | 2.2  | 64.4 | 70.8 |
| 279      | ATC279ATT        | WT     | 3          | 0.0                     | 20.8 | 13.7 | 2.6  |

**Supplementary Table 5:** Sequencing and SNP statistics of populations selected on cefoxitin. EvoHost denotes the host in which evolution took place, and PhenHost denotes the 'retransformation' host, in which the phenotype was assessed. EP and WT refer to error-prone, and wild-type strains, respectively. MIC is the minimal inhibitory concentration in  $\mu\text{g}/\text{mL}$ .

| Population | EvoHost | PhenHost | Antibiotic | MIC | Reads | SNPs Per Read |
|------------|---------|----------|------------|-----|-------|---------------|
| EP_1       | EP      | EP       | CXIT       | 4   | 1937  | 4.65          |
| EP_1       | EP      | WT       | CXIT       | 4   | 1990  | 5.14          |
| EP_2       | EP      | EP       | CXIT       | 4   | 2016  | 4.72          |
| EP_2       | EP      | WT       | CXIT       | 2   | 1863  | 5.02          |
| EP_3       | EP      | EP       | CXIT       | 4   | 2086  | 5.37          |
| EP_3       | EP      | WT       | CXIT       | 4   | 2209  | 6.76          |
| EP_4       | EP      | EP       | CXIT       | 4   | 2129  | 6.92          |
| EP_4       | EP      | WT       | CXIT       | 8   | 1874  | 7.13          |
| WT_1       | WT      | EP       | CXIT       | 2   | 2078  | 7.06          |
| WT_1       | WT      | WT       | CXIT       | 4   | 1806  | 7.52          |
| WT_2       | WT      | EP       | CXIT       | 2   | 2084  | 8.79          |
| WT_2       | WT      | WT       | CXIT       | 8   | 1854  | 10.43         |
| WT_3       | WT      | EP       | CXIT       | 4   | 2155  | 5.03          |
| WT_3       | WT      | WT       | CXIT       | 4   | 1813  | 7.13          |
| WT_4       | WT      | EP       | CXIT       | 8   | 1825  | 8.08          |
| WT_4       | WT      | WT       | CXIT       | 8   | 1665  | 7.42          |



**Supplementary Table 6:** Sequencing and SNP statistics of populations selected on oxacillin + clavulanic acid. EvoHost denotes the host in which evolution took place, and PhenHost denotes the 'retransformation' host, in which the phenotype was assessed. EP and WT refer to error-prone, and wild-type strains, respectively. MIC is the minimal inhibitory concentration in  $\mu\text{g}/\text{mL}$ .

| Population | EvoHost | PhenHost | Antibiotic | MIC  | Reads | SNPs Per Read |
|------------|---------|----------|------------|------|-------|---------------|
| EP_1       | EP      | EP       | OXAK       | 512  | 1769  | 3.27          |
| EP_1       | EP      | WT       | OXAK       | 1024 | 1968  | 5.73          |
| EP_2       | EP      | EP       | OXAK       | 512  | 1896  | 3.56          |
| EP_2       | EP      | WT       | OXAK       | 2048 | 1958  | 3.81          |
| EP_3       | EP      | EP       | OXAK       | 512  | 1650  | 4.09          |
| EP_3       | EP      | WT       | OXAK       | 1024 | 2621  | 5.57          |
| EP_4       | EP      | EP       | OXAK       | 512  | 1589  | 5.83          |
| EP_4       | EP      | WT       | OXAK       | 2048 | 1716  | 11.59         |
| WT_1       | WT      | EP       | OXAK       | 512  | 1613  | 5.69          |
| WT_1       | WT      | WT       | OXAK       | 1024 | 2208  | 7.33          |
| WT_2       | WT      | EP       | OXAK       | 512  | 2013  | 7.88          |
| WT_2       | WT      | WT       | OXAK       | 1024 | 2093  | 9.39          |
| WT_3       | WT      | EP       | OXAK       | 256  | 1812  | 5.15          |
| WT_3       | WT      | WT       | OXAK       | 1024 | 2265  | 9.37          |
| WT_4       | WT      | EP       | OXAK       | 512  | 2109  | 7.20          |
| WT_4       | WT      | WT       | OXAK       | 1024 | 1843  | 7.82          |

**Supplementary Table 7:** Sequencing and SNP statistics of populations selected on piperacillin. Evo-Host denotes the host in which evolution took place, and PhenHost denotes the 'retransformation' host, in which the phenotype was assessed. EP and WT refer to error-prone, and wild-type strains, respectively. MIC is the minimal inhibitory concentration in  $\mu\text{g}/\text{mL}$ .

| Population | EvoHost | PhenHost | Antibiotic | MIC  | Reads | SNPs Per Read |
|------------|---------|----------|------------|------|-------|---------------|
| EP_1       | EP      | EP       | PIP        | 512  | 2095  | 4.16          |
| EP_1       | EP      | WT       | PIP        | 1024 | 1674  | 4.68          |
| EP_2       | EP      | EP       | PIP        | 512  | 2287  | 4.31          |
| EP_2       | EP      | WT       | PIP        | 1024 | 1913  | 4.37          |
| EP_3       | EP      | EP       | PIP        | 512  | 2145  | 5.33          |
| EP_3       | EP      | WT       | PIP        | 1024 | 2028  | 5.49          |
| EP_4       | EP      | EP       | PIP        | 512  | 2236  | 6.76          |
| EP_4       | EP      | WT       | PIP        | 1024 | 1932  | 6.65          |
| WT_1       | WT      | EP       | PIP        | 512  | 1971  | 6.38          |
| WT_1       | WT      | WT       | PIP        | 1024 | 2085  | 6.52          |
| WT_2       | WT      | EP       | PIP        | 512  | 1836  | 8.50          |
| WT_2       | WT      | WT       | PIP        | 1024 | 1915  | 8.71          |
| WT_3       | WT      | EP       | PIP        | 256  | 1931  | 5.00          |
| WT_3       | WT      | WT       | PIP        | 512  | 1659  | 5.19          |
| WT_4       | WT      | EP       | PIP        | 512  | 1827  | 8.00          |
| WT_4       | WT      | WT       | PIP        | 1024 | 1933  | 8.11          |

**Supplementary Table 8: Primers and barcodes used for mutagenesis and sequencing**

| Primer   | Sequence                                                  | Barcode |
|----------|-----------------------------------------------------------|---------|
| BC01     | GGTAGGAGCAATGTAAAACGACGGCCAGT                             | AGCAAT  |
| BC02     | GGTAGGCCTGTTGTAAAACGACGGCCAGT                             | CCTGTT  |
| BC03     | GGTAGGGGGTTTGTAAAACGACGGCCAGT                             | GGGTTT  |
| BC04     | GGTAGGGAAGGCGTAAAACGACGGCCAGT                             | GAAGGC  |
| BC09     | GGTAGGTTAGGTGTAAAACGACGGCCAGT                             | TTAGGT  |
| BC10     | GGTAGGGTGCATGTAAAACGACGGCCAGT                             | GTGCAT  |
| BC11     | GGTAGGAACTTTGTAAAACGACGGCCAGT                             | AACTTT  |
| BC12     | GGTAGGGGATCGGTAAAACGACGGCCAGT                             | GGATCG  |
| BC13     | GGTAGGATAAGGGTAAAACGACGGCCAGT                             | ATAAGG  |
| BC14     | GGTAGGATTGGTGTAAAACGACGGCCAGT                             | ATTGGT  |
| BC15     | GGTAGGAGTGAGGTAAAACGACGGCCAGT                             | AGTGAG  |
| BC16     | GGTAGGCCACCGTAAAACGACGGCCAGT                              | CCCACC  |
| BC21     | GGTAGGAACCTGGTAAAACGACGGCCAGT                             | AACCTG  |
| BC22     | GGTAGGCTTTGCGTAAAACGACGGCCAGT                             | CTTTGC  |
| BC23     | GGTAGGTGGAGAGTAAAACGACGGCCAGT                             | TGGAGA  |
| BC24     | GGTAGGAATTGTGTAAAACGACGGCCAGT                             | AATTGT  |
| BC25     | GGTAGGTGACGAGTAAAACGACGGCCAGT                             | TGACGA  |
| BC27     | GGTAGGGTTCAGGTAAAACGACGGCCAGT                             | G TTCAG |
| BC28     | GGTAGGCTTCAAGTAAAACGACGGCCAGT                             | CTTCAA  |
| TEM1FS-F | GTAAAACGACGGCCAGTGAATAATATTGAAAAAGGAAGC                   | -       |
| TEM1FS-R | CAAGCAGAAGACGGCATAACGAGCTCTTCCGATCTGTAAACTTGGTCTGACAGGAGC | -       |
| ELP      | GGTAGGCAAGCAGAAGACGGCAT                                   | -       |
| TEM-F6   | GCTTAAGAATAATATTGAAAAAGG                                  | -       |
| TEM-R6   | GAATTGTAAACTTGGTCTGACA                                    | -       |

**Supplementary Table 9:** Concentrations of beta-lactam antibiotics used to test antibiotic susceptibility of evolved TEM-1 populations. All concentrations are given in  $\mu\text{g}/\text{mL}$ . The concentration of clavulanic acid was  $0.1 \mu\text{g}/\text{mL}$  in combination with cefotaxime, and  $0.5 \mu\text{g}/\text{mL}$  in combination with oxacillin.

| Cefotaxime | Cefotaxime +<br>clavulanic acid | Ceftazidime | Cefoxitin | Oxacillin +<br>clavulanic acid | Piperacillin |
|------------|---------------------------------|-------------|-----------|--------------------------------|--------------|
| 0.0625     | 0.0156                          | 0.25        | 0.0156    | 2                              | 2            |
| 0.125      | 0.0312                          | 0.5         | 0.0312    | 4                              | 4            |
| 0.25       | 0.0625                          | 1           | 0.0625    | 8                              | 8            |
| 0.5        | 0.125                           | 2           | 0.125     | 16                             | 16           |
| 1          | 0.25                            | 4           | 0.25      | 32                             | 32           |
| 2          | 0.5                             | 8           | 0.5       | 64                             | 64           |
| 4          | 1                               | 16          | 1         | 128                            | 128          |
| 8          | 2                               | 32          | 2         | 256                            | 256          |
| 16         | 4                               | 64          | 4         | 512                            | 512          |
| 32         | 8                               | 128         | 8         | 1024                           | 1024         |
| 64         | 16                              | 256         | 16        | 2048                           | 2048         |

**Supplementary Table 10:** Median minimal inhibitory concentrations (MIC) of six beta-lactam antibiotics for TEM-1 populations expressed in error-prone hosts. EvoHost denotes the host in which evolution took place. All concentrations are given in  $\mu\text{g}/\text{mL}$ . CTX = Cefotaxime, CTXK = Cefotaxime + 0.1  $\mu\text{g}/\text{mL}$  clavulanic acid, CTZ = Ceftazidime, CXIT = Cefoxitin, OXAK = Oxacillin + 0.5  $\mu\text{g}/\text{mL}$  clavulanic acid, PIP = Piperacillin.

| Population      | EvoHost | CTX    | CTXK   | CTZ  | CXIT | OXAK | PIP |
|-----------------|---------|--------|--------|------|------|------|-----|
| Ancestral TEM-1 | -       | 0.0625 | 0.0312 | 0.5  | 4    | 2048 | 512 |
| EP_1            | EP      | 16     | 0.125  | 64   | 4    | 256  | 256 |
| EP_2            | EP      | 16     | 0.125  | 64   | 4    | 256  | 256 |
| EP_3            | EP      | 16     | 0.125  | 64   | 8    | 256  | 256 |
| EP_4            | EP      | 16     | 0.125  | 64   | 6    | 256  | 256 |
| WT_1            | WT      | 16     | 0.125  | 32.0 | 8    | 256  | 256 |
| WT_2            | WT      | 16     | 0.125  | 64   | 8    | 256  | 256 |
| WT_3            | WT      | 8      | 0.0625 | 16   | 8    | 256  | 128 |
| WT_4            | WT      | 16     | 0.125  | 32   | 4    | 256  | 256 |

**Supplementary Table 11:** Median minimal inhibitory concentrations (MIC) of six beta-lactam antibiotics for TEM-1 populations expressed in wild-type hosts. EvoHost denotes the host in which evolution took place. All concentrations are given in  $\mu\text{g}/\text{mL}$ . CTX = Cefotaxime, CTXK = Cefotaxime + 0.1  $\mu\text{g}/\text{mL}$  clavulanic acid, CTZ = Ceftazidime, CXIT = Cefoxitin, OXAK = Oxacillin + 0.5  $\mu\text{g}/\text{mL}$  clavulanic acid, PIP = Piperacillin.

| Population      | EvoHost | CTX    | CTXK   | CTZ | CXIT | OXAK   | PIP  |
|-----------------|---------|--------|--------|-----|------|--------|------|
| Ancestral TEM-1 |         | 0.0625 | 0.0625 | 0.5 | 8    | > 2048 | 1024 |
| EP_1            | EP      | 16     | 0.2500 | 64  | 8    | 384    | 512  |
| EP_2            | EP      | 32     | 0.2500 | 64  | 8    | 512    | 512  |
| EP_3            | EP      | 16     | 0.2500 | 96  | 8    | 256    | 512  |
| EP_4            | EP      | 32     | 0.2500 | 64  | 8    | 384    | 512  |
| WT_1            | WT      | 32     | 0.2500 | 64  | 8    | 384    | 512  |
| WT_2            | WT      | 32     | 0.2500 | 128 | 8    | 512    | 512  |
| WT_3            | WT      | 8      | 0.1250 | 32  | 4    | 256    | 256  |
| WT_4            | WT      | 32     | 0.2500 | 64  | 8    | 256    | 512  |

## Supplementary References

- [1] Bratulic, S., Gerber, F. & Wagner, A. Mistranslation drives the evolution of robustness in TEM-1  $\beta$ -lactamase. *Proceedings of the National Academy of Sciences* **112**, 201510071 (2015).
- [2] Palzkill, T. & Botstein, D. Identification of amino acid substitutions that alter the substrate specificity of TEM-1  $\beta$ -lactamase. *Journal of bacteriology* **174**, 5237–43 (1992).
- [3] Orenica, M. C., Yoon, J. S., Ness, J. E., Stemmer, W. P. C. & Stevens, R. C. Predicting the emergence of antibiotic resistance by directed evolution and structural analysis. *Nature Structural Biology* **8**, 238–242 (2001).
- [4] Weinreich, D. M., Delaney, N. F., Depristo, M. A. & Hartl, D. L. Darwinian evolution can follow only very few mutational paths to fitter proteins. *Science* **312**, 111–114 (2006).
- [5] Salverda, M. L. M. *et al.* Initial mutations direct alternative pathways of protein evolution. *PLoS Genetics* **7**, e1001321 (2011).
- [6] Dellus-gur, E., Toth-Petroczy, A., Elias, M. & Tawfik, D. S. What makes a protein fold amenable to functional innovation? Fold polarity and stability tradeoffs. *Journal of Molecular Biology* **425**, 2609–21 (2013).
- [7] Kather, I., Jakob, R. P., Dobbek, H. & Schmid, F. X. Increased folding stability of TEM-1  $\beta$ -lactamase by *in vitro* selection. *Journal of Molecular Biology* **383**, 238–51 (2008).
- [8] Salverda, M. L. M., de Visser, J. A. G. & Barlow, M. Natural evolution of TEM-1  $\beta$ -lactamase: experimental reconstruction and clinical relevance. *FEMS Microbiology Reviews* **34**, 1015–36 (2010).
- [9] Jolliffe, I. T. *Principal Component Analysis*. Springer Series in Statistics (Springer, 2002).

- [10] Schymkowitz, J. *et al.* The FoldX web server: an online force field. *Nucleic Acids Research* **33**, W382–W388 (2005).
- [11] Ambler, R. & Coulson, A. A standard numbering scheme for the class A  $\beta$ -lactamases. *Biochemical Journal* **276**, 269–272 (1991).
